# Supplementary material
Source: PubMed Central journal article supplement (PMC4135692)
Supplement: JB.01756-14_zjb999093294so1.pdf [file JB.01756-14_zjb999093294so1.pdf]

## Supplemental Materials

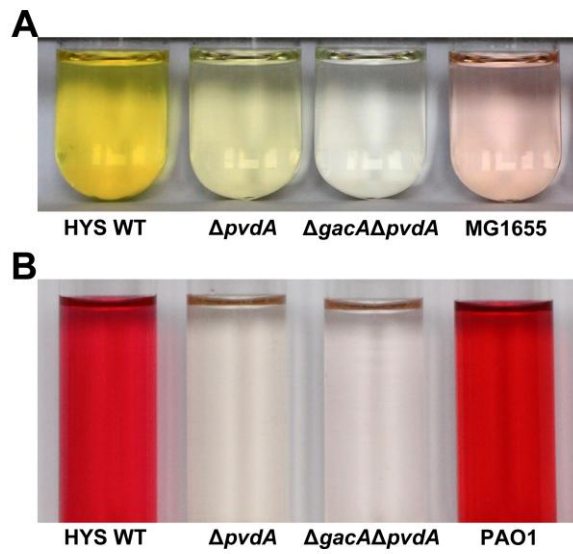

**FIG. S1.** Results of the Arnov (A) and modified Csáky (B) tests for catechol-type and hydroxamate-type siderophore activity, respectively, using cell-free culture supernatants of wild-type *Pseudomonas* sp. HYS and its genetically modified strains. Cell-free culture supernatants of *E. coli* MG1655 and *P. aeruginosa* PAO1 were used as positive controls in the Arnov and modified Csáky tests, respectively.

**TABLE S1. Oligonucleotide primers used in this study**

| Primer      | Sequence (5'-3') <sup>a</sup>     | Use                         |
|-------------|-----------------------------------|-----------------------------|
| gacS-up-1   | CCGGAATTCTAGCAGGATGTCCATCAAC      | $\Delta$ <i>gacS</i>        |
| gacS-up-2   | TGCTCTAGACCAGTGCCATCAGGCTG        | $\Delta$ <i>gacS</i>        |
| gacS-down-1 | GCTCTAGAGCCTGAACCCTGGCTGAC        | $\Delta$ <i>gacS</i>        |
| gacS-down-2 | CCCAAGCTTAGGCCGGTACTCGCA          | $\Delta$ <i>gacS</i>        |
| gacS-M-1    | TCGACCATGCTGAAGGGTTT              | Knock verify of <i>gacS</i> |
| gacS-M-2    | GGTTGAGTGCCAGGATCAGTG             | Knock verify of <i>gacS</i> |
| gacS-1      | CGGAATTCGCGCACAGGAGAGTG           | <i>gacS</i> amplicon        |
| gacS-2      | CGGGATCCTCAGGCGCTCATGC            | <i>gacS</i> amplicon        |
| gacA-up-1   | GGAATTCACCCAGCGGTATTTGG           | $\Delta$ <i>gacA</i>        |
| gacA-up-2   | GCTCTAGAGTGATGCCCGTACGCA          | $\Delta$ <i>gacA</i>        |
| gacA-down-1 | GCTCTAGAGCCACGGCATGGTTGA          | $\Delta$ <i>gacA</i>        |
| gacA-down-2 | CCCAAGCTTGGGTGCGGTTGCT            | $\Delta$ <i>gacA</i>        |
| gacA-M-1    | ACGGAATCGGTTTCGCGTATC             | Knock verify of <i>gacA</i> |
| gacA-M-2    | CGCCTTGCAGCGCTTGAT                | Knock verify of <i>gacA</i> |
| gacA-1      | CAAAGAATTCCAATTACCGCCGAGTGCGAG    | <i>gacA</i> amplicon        |
| gacA-2      | CAAAGGATCCGAATGCGCTCAGAGACTGGCGTC | <i>gacA</i> amplicon        |
| pvdA-up-1   | GGAATTCACCCGCAACGCCAACA           | $\Delta$ <i>pvdA</i>        |
| pvdA-up-2   | GCTCTAGATGTGTCGTCGATTCTTGAAG      | $\Delta$ <i>pvdA</i>        |
| pvdA-down-1 | GCTCTAGACGCCTGAAGCGAGAG           | $\Delta$ <i>pvdA</i>        |
| pvdA-down-2 | CCCAAGCTTACCACGGTCAGGG            | $\Delta$ <i>pvdA</i>        |
| pvdA-M-1    | GCACTACCGCATGGTCAGC               | Knock verify of <i>pvdA</i> |
| pvdA-M-2    | ACAGCATCGCCAGGTAGCC               | Knock verify of <i>pvdA</i> |
| orf1-up-1   | GGAATTCAGCTTGTCTGTCAGGCTC         | $\Delta$ <i>orf1</i>        |
| orf1-up-2   | GCTCTAGAGCGTTCCAGGAAGGCT          | $\Delta$ <i>orf1</i>        |
| orf1-down-1 | GCTCTAGACATCGTGAACGTCCTTT         | $\Delta$ <i>orf1</i>        |
| orf1-down-2 | CCCAAGCTTCTCGTCAGCCAGTT           | $\Delta$ <i>orf1</i>        |
| orf1-M-1    | CCTCGGTCAGGAACGGAGTC              | Knock verify of <i>orf1</i> |
| orf1-M-2    | CCTGCCAGTGTTCAATCTCG              | Knock verify of <i>orf1</i> |
| orf2-up-1   | CGAGCTCAACGAGGACCAGACG            | $\Delta$ <i>orf2</i>        |
| orf2-up-2   | GCTCTAGATGAAGCGGTCGAGCCA          | $\Delta$ <i>orf2</i>        |
| orf2-down-1 | GCTCTAGAAGTCCAGGAGAGTTTCATTGC     | $\Delta$ <i>orf2</i>        |
| orf2-down-2 | CCCAAGCTTCTCAACGATGTTTCAACT       | $\Delta$ <i>orf2</i>        |
| orf2-M-1    | TCACCGTGCAGCCGAGTT                | Knock verify of <i>orf2</i> |
| orf2-M-2    | GCGCCGCACTCGGTTAT                 | Knock verify of <i>orf2</i> |
| orf3-up-1   | CGAGCTCTGCGGGTTTCGCT              | $\Delta$ <i>orf3</i>        |
| orf3-up-2   | GCTCTAGAAAACGCTAAAAGCCTGC         | $\Delta$ <i>orf3</i>        |
| orf3-down-1 | GCTCTAGACATCTGGGCGACG             | $\Delta$ <i>orf3</i>        |

|             |                                    |                                     |
|-------------|------------------------------------|-------------------------------------|
| orf3-down-2 | CCCAAGCTTCAACAGCGCTATCGA           | $\Delta orf3$                       |
| orf3-M-1    | CAGCATGGCCTTGGCTG                  | Knock verify of <i>orf3</i>         |
| orf3-M-2    | CTGCCGACTCCGTTCC                   | Knock verify of <i>orf3</i>         |
| orf4-up-1   | CGAGCTCACATCACTGACGACGACT          | $\Delta orf4$                       |
| orf4-up-2   | GCTCTAGAAGCCAGCCCCGCAAT            | $\Delta orf4$                       |
| orf4-down-1 | GCTCTAGAGCCAATGGTCATATCCATGAT      | $\Delta orf4$                       |
| orf4-down-2 | CCCAAGCTTTGGGAAGACCATTCT           | $\Delta orf4$                       |
| orf4-M-1    | CGAACAGATCCAGCGCAAGC               | Knock verify of <i>orf4</i>         |
| orf4-M-2    | TGCGGGTCGGGATCTTCGGT               | Knock verify of <i>orf4</i>         |
| rsmY-up-1   | CGAGCTCTACGAAGGCACCAAC             | $\Delta rsmY$                       |
| rsmY-up-2   | GCTCTAGAGTAAGAAGATTAAGTGTGGA       | $\Delta rsmY$                       |
| rsmY-down-1 | GCTCTAGACTTTTGCCTGCGATTG           | $\Delta rsmY$                       |
| rsmY-down-2 | GCGTCGACCTGTTGTTGTACGAAG           | $\Delta rsmY$                       |
| rsmY-M-1    | CCATGGTTACATCCGTGAG                | Knock verify of <i>rsmY</i>         |
| rsmY-M-2    | GCCTGGAAATCGAACG                   | Knock verify of <i>rsmY</i>         |
| rsmZ-up-1   | GGAATTCTGTCTGGAAGGGCAC             | $\Delta rsmZ$                       |
| rsmZ-up-2   | GCTCTAGATTGCCGCAACAAACA            | $\Delta rsmZ$                       |
| rsmZ-down-1 | GCTCTAGACAGGACAAATACTAACGCG        | $\Delta rsmZ$                       |
| rsmZ-down-2 | GCGTCGACTGTTGGCCTGGAGA             | $\Delta rsmZ$                       |
| rsmZ-M-1    | CCCGCACAAGCTGATAG                  | Knock verify of <i>rsmZ</i>         |
| rsmZ-M-2    | ACAAGCAGCGTGAGGTG                  | Knock verify of <i>rsmZ</i>         |
| rsmA-up-1   | CAAAGAATTCGCACGATAACACCACCGACTTC   | $\Delta rsmA$                       |
| rsmA-up-2   | CAAATCTAGAATCAACATAGCTTTCTCCTCACGC | $\Delta rsmA$                       |
| rsmA-down-1 | CAAATCTAGAACCAACCCATTAATTTTTATCGAG | $\Delta rsmA$                       |
| rsmA-down-2 | CAAAAAGCTTGATGGACCAGATCACCTCTGG    | $\Delta rsmA$                       |
| rsmA-M-1    | GATGAAGCCAAGCTGACCATTTCGTG         | Knock verify of <i>rsmA</i>         |
| rsmA-M-2    | GAAAGCAAAAAGCCCGCCTTGATAG          | Knock verify of <i>rsmA</i>         |
| rsmA-1      | GCGTCGACTGAGGAGAAAGCTATGT          | <i>rsmA</i> amplicon                |
| rsmA-2      | GGAATTCCTTAATGGGTTGGTTCTTCG        | <i>rsmA</i> amplicon                |
| rsmE-up-1   | CGAGCTCGCATCACCCGTTA               | $\Delta rsmE$                       |
| rsmE-up-2   | GCTCTAGATATCAGCATGTATATCTC         | $\Delta rsmE$                       |
| rsmE-down-1 | GCTCTAGAGAGCACTAAGTAGCCCCCA        | $\Delta rsmE$                       |
| rsmE-down-2 | CCCAAGCTTCGGGTGGTAACAC             | $\Delta rsmE$                       |
| rsmE-M-1    | TCGAAGGCCAGGTCAGTGCCTACAACA        | Knock verify of <i>rsmE</i>         |
| rsmE-M-2    | GCTCAAGCGTTTGCTGTCGGTCCTCA         | Knock verify of <i>rsmE</i>         |
| rsmE-1      | GCGTCGACCAAGGAGATATACATG           | <i>rsmE</i> amplicon                |
| rsmE-2      | GGAATTCCTTAGTGCTCGTCGCCTC          | <i>rsmE</i> amplicon                |
| U1          | GCTCATCAATCTCCTCAAGCATG            | TAIL-PCR;<br>Arbitrarily primed PCR |
| U2          | TTGGGCATACGGGAAGAAGT               | TAIL-PCR;                           |

|               |                                      |                              |
|---------------|--------------------------------------|------------------------------|
|               |                                      | Arbitrarily primed PCR       |
| U3            | GGATGAAGTGGTTCGCATCCT                | TAIL-PCR                     |
| AD-1          | NTCgA(g/C)T(A/T)T(g/C)g(A/T)gTT      | TAIL-PCR                     |
| AD-2          | NgTCgA(g/C)(A/T)gANA(A/T)Gaa         | TAIL-PCR                     |
| AD-3          | (A/T)gTgNAg(A/T)ANCANAgA             | TAIL-PCR                     |
| AD-4          | Tg(A/T)gNAg(A/T)ANCA(g/C)AgA         | TAIL-PCR                     |
| ARB1          | GGCCACGCGTCGACTAGTACNNNNNNNNNGATAT   | Arbitrarily primed PCR       |
| ARB2          | GGCCACGCGTCGACTAGTAC                 | Arbitrarily primed PCR       |
| lacZ-1        | CCG <u>CTCGAG</u> ATGACCATGATTACGGAT | <i>lacZ</i> amplicon         |
| lacZ-2        | GCAGGGCCCTTATTTTTGACACCAG            | <i>lacZ</i> amplicon         |
| Pnfs-1        | CCCA <u>AAGCTT</u> CAGTCCACGCCTGTC   | <i>nfs</i> promoter amplicon |
| Pnfs-2        | CCG <u>CTCGAGG</u> ACGGTGTCAAAAC     | <i>nfs</i> promoter amplicon |
| orf1-orf2RT-1 | GCACGCCTACCTCTGCTAC                  | RT-PCR                       |
| orf1-orf2RT-2 | GCGGTCTTTCTGCTCGTC                   | RT-PCR                       |
| orf2-orf3RT-1 | CAACCACCAGTATGTGCAGAAG               | RT-PCR                       |
| orf2-orf3RT-2 | CACCAACGAGGACCAGACG                  | RT-PCR                       |
| orf3-orf4RT-1 | CGACATGCTGATCATTCGCG                 | RT-PCR                       |
| orf3-orf4RT-2 | ACAGGGTGTGGTGCATCAGG                 | RT-PCR                       |

---

<sup>a</sup> Specified restriction sites are underlined.
